# Supplementary material
Source: publisher site journal article supplement (https://en-cdn.bio-protocol.org/attached/file/20170903/Supplement%20file%203%20Aequorin%20script.docx)
Supplement: Supplementary file 1 [file Supplement%20file%203%20Aequorin%20script.docx]

**Supplement file 3_Aequorin script**

clear all

%%

%FOLDERS SELECTION

%Selecting assay folders containing data and avi files

%(Warning: make sure hdf data file is in the same folder as all_trials.avi file!)

files=uipickfiles('FilterSpec','/Users/stevenknafo1/Documents/MATLAB/Aequorin_data/Charlie_data/Aequorin/Mnx','Prompt','Select folders with data files');

%Assay parameters

durationTrials=2500; %duration of each trial in ms

binningTime=10; %binning time for photons count in ms

%TIMELINE ANALYSIS

for numFile=1:length(files)

FilePath = files{1,numFile};

[PathName,FolderName]=fileparts(FilePath);

DataFile=fullfile(PathName,FolderName,[FolderName '_0.hdf']);

%Importing the data file

data = dataset('File',fullfile(DataFile),'delimiter',';','HeaderLines',3,'ReadVarNames',false);

%Naming columns and creating variables

data.Properties.VarNames = {'index', 'image', 'timestamp', 'shutter', 'PMT', 'stim1', 'stim2'};

%Determine assay parameters

assayPhotons=data(:,:);

numTrials=round(length(data)/durationTrials);

durationAssay=numTrials*durationTrials;

%Create stimuli timeline

stim=zeros(durationTrials,1);

stim=assayPhotons.stim1+assayPhotons.stim2;

stim(length(stim):durationAssay)=stim(length(stim));

%Create frames timeline

image=zeros(durationTrials,1);

image=assayPhotons.image;

image(length(image):durationAssay)=image(length(image));

%Creating cell arrays

trial_stimulus = cell (numTrials,1);

trial_stim_start = cell(numTrials,1);

trial_frame_start = cell(numTrials,1);

trial_frame_end = cell(numTrials,1);

trial_frame = cell(numTrials,1);

assay_frame_stim_start= cell(numTrials,1);

trial_frame_stim_start = cell(numTrials,1);

%Filling the cell arrays with discrete values for each trial

for i= 1:numTrials;

Limit_inf = (i-1)*2500+1;

Limit_sup = (Limit_inf+2498);

trial_stimulus {i} = stim (Limit_inf : Limit_sup);

trial_frame{i}=image(Limit_inf : Limit_sup);

trial_frame_start{i}=image(Limit_inf);

trial_frame_end{i}=image(Limit_sup);

trial_stim_start{i} = find(trial_stimulus{i},1,'first');

assay_frame_stim_start{i}=trial_frame{i}(trial_stim_start{i},1);

trial_frame_stim_start{i}=assay_frame_stim_start{i}-trial_frame_start{i};

end

Frame_Stim = [trial_frame_start,trial_frame_end,trial_stim_start,assay_frame_stim_start,trial_frame_stim_start];

Timeline = cell2dataset (Frame_Stim,'ReadVarNames',false, 'VarNames', {'trial_frame_start','trial_frame_end', 'trial_stim_start', 'assay_frame_stim_start', 'trial_frame_stim_start'});

save(fullfile(strrep(DataFile,'.hdf','_Quantitative')),'Timeline');

end

clearvars -except files numTrials durationTrials durationAssay binningTime

%%

% BIOLUMINESCENCE ANALYSIS

for numFile=1:length(files);

FilePath = files{1,numFile};

[PathName,FolderName]=fileparts(FilePath);

DataFile=fullfile(PathName,FolderName,[FolderName '_0.hdf']);

load(fullfile(strrep(DataFile,'.hdf','_Quantitative')));

%Importing the data file

data = dataset('File',fullfile(DataFile),'delimiter',';','HeaderLines',3,'ReadVarNames',false);

%Naming columns and creating variables

data.Properties.VarNames = {'index', 'image', 'timestamp', 'shutter', 'PMT', 'stim1', 'stim2'};

%Determine number of photons per ms

data.photons_ms = diff(data.PMT);

%Keep only assay lines

assayPhotons=data.photons_ms(:,:);

assayPhotons(length(assayPhotons):durationAssay)=assayPhotons(length(assayPhotons));

assayPhotons=assayPhotons(1:durationAssay);

%Sum the number of photons according to binning time

A=reshape(assayPhotons,binningTime,length(assayPhotons)/binningTime);

photons_binned = sum(reshape(assayPhotons,binningTime,length(assayPhotons)/binningTime));

%Replacing PMT artefact outliers by median value + add first value

outlier_threshold=100;

photons_binned(photons_binned>outlier_threshold)=median(median(photons_binned));

%Creating cell arrays

photons = cell(numTrials,1);

%Filling the cell arrays with discrete values for each trial

for i= 1:numTrials;

Limit_inf = (i-1)*(durationTrials/binningTime)+1;

Limit_sup = (i)*(durationTrials/binningTime);

photons {i} = photons_binned(Limit_inf:Limit_sup);

end

%Grouping all trials within one dataset

B_all_trials = photons;

%Filtering signal

filtered_signal=zeros((durationTrials/binningTime),numTrials);

B_per_trial=cell(numTrials,durationTrials/binningTime);

windowSize = 10;

for i=1:numTrials;

B_per_trial{i,1}=B_all_trials{i,1};

filtered_signal(:,i)=filter(ones(1,windowSize)/windowSize,1,B_per_trial{i,1});

end;

%Linear fit of noise (based on first 500ms of each trial)

coeff_noise=zeros(2,numTrials);

cum_noise_only_trial=zeros((durationTrials/binningTime),numTrials);

cum_signal_only_trial=zeros((durationTrials/binningTime));

signal_only_trial=zeros((durationTrials/binningTime)-1,numTrials);

time=1:binningTime:2500;

for i=1:numTrials,

B_baseline=cumsum(filtered_signal(1:50,i));

T_baseline=rot90(1:10:500,3);

linear_noise=fit(T_baseline,B_baseline,'poly1');

coeff_noise(:,i)=coeffvalues(linear_noise);

cum_noise_only_trial(:,i)=coeff_noise(1,i)*time+coeff_noise(2,i);

cum_signal_only_trial(:,i)=(cumsum(filtered_signal(:,i))-cum_noise_only_trial(:,i));

signal_only_trial(:,i)=diff(cum_signal_only_trial(:,i));

end

%Quantitative analysis of bioluminescence signals

signal_start_time = cell (numTrials,1);

signal_end_time = cell (numTrials,1);

variationSignal=cell(numTrials,1);

signal = cell (numTrials,1);

latency = cell (numTrials,1);

amplitude = cell (numTrials,1);

integrale = cell (numTrials,1);

duration = cell (numTrials,1);

time2peak = cell (numTrials,1);

decay = cell (numTrials,1);

threshold_start=0.4; N_start=3;

threshold_end=0.2; N_end=3;

for i=1:numTrials;

variationSignal{i,1}=diff(signal_only_trial(:,i)); variationSignal{i,1}(durationTrials/binningTime)=0;

start_signal{i,1}=find(abs(variationSignal{i,1})>threshold_start); start_signal{i,1}=rot90(start_signal{i,1});

x=diff(start_signal{i,1})==1;

f=find([false,x]~=[x,false]);

g=find(f(2:2:end)-f(1:2:end-1)>=N_start,1,'first');

signal_start_time{i,1} = start_signal{i,1}(f(2*g-1)); % First value followed by >=N consecutive numbers

variationSignal{i,1}=variationSignal{i,1}(signal_start_time{i,1}:end);

end_signal{i,1}=find(abs(variationSignal{i,1})<threshold_end); end_signal{i,1}=rot90(end_signal{i,1});

y=diff(end_signal{i,1})==1;

u=find([false,y]~=[y,false]);

h=find(u(2:2:end)-u(1:2:end-1)>=N_end,1,'first');

empty_cells = cellfun('isempty',signal_start_time);

signal_start_time(empty_cells) = {0};

empty_cells = cellfun('isempty',signal_end_time);

signal_end_time(empty_cells) = {0};

signal_end_time{i,1} = end_signal{i,1}(u(2*h-1))+signal_start_time{i,1};

signal{i}= signal_only_trial(signal_start_time{i}:signal_end_time{i},i);

if signal_start_time{i}==0;

latency{i}=0;

else

latency{i}=signal_start_time{i}*10-Timeline.trial_stim_start(i); %*10 pour avoir la valeur en ms

end

[amplitude{i},time2peak{i}] = max (signal{i});

duration{i} = length (signal{i})*binningTime;

time2peak{i}=time2peak{i}*binningTime;

decay{i} = duration{i}-time2peak{i};

integrale{i} = trapz (signal{i});

end

%Display bioluminescence signals for each trial

figure('units','normalized','outerposition',[0 0 1 1]);

X_axis_top=max(max(signal_only_trial(:,:)));

for i=1:numTrials,

subplot(1*numTrials/10,10,i),plot(signal_only_trial(:,i),'g', 'LineWidth',1), title(['trial ',num2str(i)])

if signal_start_time{i,1} ~= 0

hold on, plot(signal_start_time{i,1},signal_only_trial(signal_start_time{i,1},i),'og'); end

if signal_end_time{i,1} ~= 0

hold on, plot(signal_end_time{i,1},signal_only_trial(signal_end_time{i,1},i),'og'); end

hold on, line([Timeline.trial_stim_start(i)/10,Timeline.trial_stim_start(i)/10],[-2,X_axis_top],'color','r')

axis([0 (durationTrials/binningTime) -2 X_axis_top]); set(gca,'FontSize',14)

end

%%

%Manually determine signals that were not properly detected

feedback=input('are there trials to modify?');

feedback_discard=zeros(numTrials,1);

for i=1:length(feedback);

j=feedback(i);

figure('units','normalized','outerposition',[0 0 1 1]),plot(signal_only_trial(:,j),'g', 'LineWidth',2)

hold on, line([Timeline.trial_stim_start(j)/10,Timeline.trial_stim_start(j)/10],[-2,X_axis_top],'color','r')

axis([0 (durationTrials/binningTime) -2 X_axis_top]);

[x,y]=ginput(1); signal_start_time{j,1}=round(x);

[x,y]=ginput(1); signal_end_time{j,1}=round(x);

signal{j}= signal_only_trial(signal_start_time{j}:signal_end_time{j},j);

if isempty(x)==1, feedback_discard(j,1)=1; signal_start_time{j}=0; end

close;

if signal_start_time{j}==0; latency{j}=0;

else latency{j}=signal_start_time{j}*10-Timeline.trial_stim_start(j); end

[amplitude{j},time2peak{j}] = max (signal{j});

duration{j} = length (signal{j})*binningTime;

time2peak{j}=time2peak{j}*binningTime;

decay{j} = duration{j}-time2peak{j};

integrale{j} = trapz (signal{j});

end

close;

%%

%Calculate rising and decay tau coefficients

rising_coeff=cell (numTrials,1); decay_coeff=cell (numTrials,1);

rising_signal=cell (numTrials,1); decay_signal=cell (numTrials,1);

rising_time=cell (numTrials,1); decay_time=cell (numTrials,1);

rising_fit=cell (numTrials,1); decay_fit=cell (numTrials,1);

rising_slope=cell (numTrials,1); decay_tau=cell (numTrials,1);

rising_gof=cell (numTrials,1); decay_gof=cell (numTrials,1);

rising_rsquare=cell (numTrials,1); decay_rsquare=cell (numTrials,1);

for i=1:numTrials,

if signal_start_time{i}==0; rising_slope{i}=0; decay_tau{i}=0;

else

rising_signal{i}=signal_only_trial(signal_start_time{i}:(signal_start_time{i}+time2peak{i}/10),i);

decay_signal{i}=signal_only_trial((signal_start_time{i}+time2peak{i}/10):signal_end_time{i},i);

rising_time{i}=rot90(signal_start_time{i}:1:(signal_start_time{i}+time2peak{i}/10),3);

decay_time{i}=rot90((signal_start_time{i}+time2peak{i}/10):1:signal_end_time{i},3);

[rising_fit{i},rising_gof{i}]=fit(rising_time{i},rising_signal{i},'poly1'); rising_coeff{i}=coeffvalues(rising_fit{i});

rising_slope{i}= rising_coeff{i,1}(1); rising_rsquare{i}=rising_gof{i}.rsquare;

[decay_fit{i},decay_gof{i}]=fit(decay_time{i},decay_signal{i},'exp1'); decay_coeff{i}=coeffvalues(decay_fit{i});

decay_tau{i}=-1/decay_coeff{i,1}(2)*10; decay_rsquare{i}=decay_gof{i}.rsquare;

% subplot(2*numTrials/10,10,i),plot(rising_fit{i},rising_time{i},rising_signal{i}),legend('off');

% subplot(2*numTrials/10,10,10+i),plot(decay_fit{i},decay_time{i},decay_signal{i}),legend('off');

end

end

%%

%Create quantitative results dataset

parameters = [signal_start_time,signal_end_time,latency,amplitude, duration, time2peak, decay, integrale, rising_slope,rising_rsquare,decay_tau,decay_rsquare];

empty_cells = cellfun('isempty',parameters); parameters(empty_cells) = {0};

%%

%Replace values with NaN in discarded trials

feedback_discard=input('are there trials to discard?');

for i=1:length(feedback_discard);

for j=1:length(parameters(i,:)); parameters{feedback_discard(i),j}=NaN; end

end

%%

Bioluminescence_quantitative = cell2dataset (parameters, 'ReadVarNames',false, 'VarNames', {'signal_start','signal_end','latency','amplitude','duration', 'time2peak', 'decay', 'integrale','rising_slope','rising_rsquare','decay_tau','decay_rsquare'});

%Calculate normalized B parameters with both z-scores and Min-Max

%Exclude discarded trials

Bioluminescence_quantitative_nonNaN=dataset2cell(Bioluminescence_quantitative);

Bioluminescence_quantitative_nonNaN(1,:)=[];

Bioluminescence_quantitative_nonNaN=cell2mat(Bioluminescence_quantitative_nonNaN);

Bioluminescence_quantitative_nonNaN(any(isnan(Bioluminescence_quantitative_nonNaN(:,3)),2),:)=[];

Bioluminescence_quantitative_nonNaN=mat2dataset(Bioluminescence_quantitative_nonNaN, 'VarNames', {'signal_start','signal_end','latency','amplitude','duration', 'time2peak', 'decay', 'integrale','rising_slope','rising_rsquare','decay_tau','decay_rsquare'});

for i=1:numTrials

%Z-score and Min-Max normalization for B_amplitude

Bioluminescence_quantitative.B_amp_Z(i)=(Bioluminescence_quantitative.amplitude(i)-mean(Bioluminescence_quantitative_nonNaN.amplitude))/std(Bioluminescence_quantitative_nonNaN.amplitude);

Bioluminescence_quantitative.B_amp_N(i)=(Bioluminescence_quantitative.amplitude(i)-min(Bioluminescence_quantitative.amplitude))/(max(Bioluminescence_quantitative.amplitude)-min((Bioluminescence_quantitative.amplitude)));

%Z-score and Min-Max normalization for B_rising_slope

Bioluminescence_quantitative.B_rise_Z(i)=(Bioluminescence_quantitative.rising_slope(i)-mean(Bioluminescence_quantitative_nonNaN.rising_slope))/std(Bioluminescence_quantitative_nonNaN.rising_slope);

Bioluminescence_quantitative.B_rise_N(i)=(Bioluminescence_quantitative.rising_slope(i)-min(Bioluminescence_quantitative.rising_slope))/(max(Bioluminescence_quantitative.rising_slope)-min((Bioluminescence_quantitative.rising_slope)));

%Z-score and Min-Max normalization for B_decay_tau

Bioluminescence_quantitative.B_decay_Z(i)=(Bioluminescence_quantitative.decay_tau(i)-mean(Bioluminescence_quantitative_nonNaN.decay_tau))/std(Bioluminescence_quantitative_nonNaN.decay_tau);

Bioluminescence_quantitative.B_decay_N(i)=(Bioluminescence_quantitative.decay_tau(i)-min(Bioluminescence_quantitative.decay_tau))/(max(Bioluminescence_quantitative.decay_tau)-min((Bioluminescence_quantitative.decay_tau)));

end

%Group signal data per trial as: raw ; filtered ; start ; end ; max ; locs

signal_data=cell(numTrials,6);

for i=1:numTrials;

signal_data{i,1}=B_per_trial{i,1};

signal_data{i,2}=signal_only_trial(:,i);

signal_data{i,3}=signal_start_time{i,1};

signal_data{i,4}=signal_end_time{i,1};

signal_data{i,5}=amplitude{i};

signal_data{i,6}=time2peak{i}+signal_start_time{i,1};

end

save(fullfile(strrep(DataFile,'.hdf','_Quantitative')),'Bioluminescence_quantitative','signal_data','-append');

end

clearvars -except files durationTrials binningTime

%%

%KINEMATICS ANALYSIS

%Read movies and place tail base points

numFile=length(files);

base_point=cell(numFile,4);

for numFile=1:length(files);

FilePath = files{1,numFile};

movie_path=fullfile(FilePath,'All_trials.avi');

all_trials_movie(numFile)=VideoReader(movie_path);

a1=figure;

S_image=read(all_trials_movie(numFile),1);

imshow(S_image);

%Get tail base coordinates

tail_base=impoint(gca,[]);

tail_base=wait(tail_base);

hold on;

scatter(tail_base(1),tail_base(2),3,'filled','g');

base_point{numFile,1}=tail_base(1);

base_point{numFile,2}=tail_base(2);

%Get tail tip coordinates

tail_tip=impoint(gca,[]);

tail_tip=wait(tail_tip);

hold on;

scatter(tail_base(1),tail_base(2),3,'filled','g');

base_point{numFile,3}=tail_tip(1);

base_point{numFile,4}=tail_tip(2);

close(a1)

end

%Tail tracking and kinematics quantitative analysis

for numFile=1:length(files);

%Setting files

FilePath = files{1,numFile};

[PathName,FolderName]=fileparts(FilePath);

DataFile=fullfile(PathName,FolderName,[FolderName '_0.hdf']);

load(fullfile(strrep(DataFile,'.hdf','_Quantitative')));

[PathName,FolderName]=fileparts(FilePath);

DataFile=fullfile(PathName,FolderName,[FolderName '_0.hdf']);

%Setting tracking parameters

number_segments=10;

segment_length=(base_point{numFile,1}-base_point{numFile,3})/number_segments;

%Setting assay parameters

numTrials=length(Timeline);

durationAssay=numTrials*durationTrials;

numFrames=Timeline.trial_frame_end(numTrials);

%Lance le tail tracker pour rÈcupÈrer les coordonnÈes des segments

[TAIL]=Tail_tracker(all_trials_movie,segment_length,number_segments,numFrames,numFile,base_point);

%Replace Nan by preceding value in TAIL

for k=1:2,

for i=1:size(TAIL,1),

for j=2:size(TAIL,2),

if (isnan(TAIL(i,j,k)))

TAIL(i,j,k)=TAIL(i,j-1,k);

end

end

end

end

%Calculate alpha angle between tail base and tip

alpha_rad=zeros(length(TAIL),1);

alpha=zeros(length(TAIL),1);

rapport=zeros(length(TAIL),1);

for frame=1:length(TAIL)

Ytip=TAIL(frame,11,1);

Ybase=TAIL(frame,1,1);

Xtip=TAIL(frame,11,2);

Xbase=TAIL(frame,1,2);

if Ytip-Ybase<=0 %flexion de la queue sur la gauche: alpha>0

if Xtip-Xbase<=0 %flexion < 90∞: Xa-Xo<0

rapport(frame,1)=(Ybase-Ytip)/(Xbase-Xtip);

alpha_rad(frame,1)=atan(rapport(frame,1));

alpha(frame,1)=alpha_rad(frame)*57.29578;

elseif Xtip-Xbase>0 %flexion > 90∞: Xa-Xo>0

rapport(frame,1)=(Ybase-Ytip)/(Xtip-Xbase);

alpha_rad(frame,1)=atan(rapport(frame,1));

alpha(frame,1)=180-(alpha_rad(frame)*57.29578);

end

elseif Ytip-Ybase>0% flexion de la queue sur la droite: alpha<0

if Xtip-Xbase<0 %flexion < 90∞: Xa-Xo<0

rapport(frame,1)=(Ybase-Ytip)/(Xtip-Xbase);

alpha_rad(frame,1)=-(atan(rapport(frame,1)));

alpha(frame,1)=alpha_rad(frame)*57.29578;

elseif Xtip-Xbase>=0 %flexion > 90∞: Xa-Xo>0

rapport(frame,1)=(Ytip-Ybase)/(Xtip-Xbase);

alpha_rad(frame,1)=-(atan(rapport(frame,1)));

alpha(frame,1)=-(180+alpha_rad(frame)*57.29578);

end

end

end

%Apply median filtering to alpha angle

alpha_filtered=medfilt2(alpha,[10 1]);

%Split angle data for each trial according to timeline limits

trial_alpha=cell(numTrials,2);

for i=1:numTrials;

trial_alpha{i,1}=alpha(Timeline.trial_frame_start(i):Timeline.trial_frame_end(i));

trial_alpha{i,1}(length(trial_alpha{i,1}):durationTrials)=trial_alpha{i,1}(length(trial_alpha{i,1}));

trial_alpha{i,2}=alpha_filtered(Timeline.trial_frame_start(i):Timeline.trial_frame_end(i));

trial_alpha{i,2}(length(trial_alpha{i,2}):durationTrials)=trial_alpha{i,2}(length(trial_alpha{i,2}));

end

%Replace Nan by interpolated value in trial_alpha

for i = 1:numTrials

times = 1:length(trial_alpha{i,2});

mask = ~isnan(trial_alpha{i,2});

trial_alpha{i,3} = trial_alpha{i,2};

trial_alpha{i,3}(~mask) = interp1(times(mask), trial_alpha{i,3}(mask), times(~mask));

end

%substract alpha baseline

for i = 1:numTrials

alpha_baseline=mean(trial_alpha{i,3}(1:400));

trial_alpha{i,3}=trial_alpha{i,3}-alpha_baseline;

end

%Find start and end of the escape response for each trial

variationAlpha=cell(numTrials,1);

movement=cell(numTrials,1);

start_frame = cell (numTrials,1);

end_frame = cell (numTrials,1);

threshold_start=0.08;%Variation threshold of alpha in degree between two consecutive frames

N_start=3; %Required number of consecutive frames above threshold to detect movement

threshold_end=0.1; N_end=20;

for i=1:numTrials;

variationAlpha{i,1}=diff(trial_alpha{i,3}); variationAlpha{i,1}(2500)=0;

movement_start{i,1}=find(abs(variationAlpha{i,1})>threshold_start); movement_start{i,1}=rot90(movement_start{i,1});

x=diff(movement_start{i,1})==1;

f=find([false,x]~=[x,false]);

g=find(f(2:2:end)-f(1:2:end-1)>=N_start,1,'first');

% First value followed by >=N consecutive numbers

start_frame{i,1} = movement_start{i,1}(f(2*g-1));

%only consider start_frame that are after frame_stim

shift=0;

while start_frame{i,1} < Timeline.trial_frame_stim_start(i);

start_frame{i,1}=start_frame{i,1}+shift;

shift=shift+1;

continue

end

%%

variationAlpha{i,1}=variationAlpha{i,1}(start_frame{i,1}:end);

movement_end{i,1}=find(abs(variationAlpha{i,1})<threshold_end); movement_end{i,1}=rot90(movement_end{i,1});

y=diff(movement_end{i,1})==1;

u=find([false,y]~=[y,false]);

h=find(u(2:2:end)-u(1:2:end-1)>=N_end,1,'first');

empty_cells = cellfun(@isempty,start_frame); start_frame(empty_cells) = {0};

end_frame{i,1} = movement_end{i,1}(u(2*h-1))+start_frame{i,1};

empty_cells = cellfun(@isempty,end_frame); end_frame(empty_cells) = {0};

end

%Compute quantitative kinematics analysis for each escape

ER = cell (numTrials,1);

latency = cell (numTrials,1);

amplitude = cell (numTrials,1);

duration = cell (numTrials,1);

N_cycles = cell (numTrials,1);

frequency = cell (numTrials,1);

pks= cell (numTrials,1);

locs=cell (numTrials,1);

for i=1:numTrials;

if end_frame{i,1}-start_frame{i,1} > 3 ;

ER{i}=trial_alpha{i,3}(start_frame{i,1}:end_frame{i,1});

latency{i}=start_frame{i}-Timeline.trial_frame_stim_start(i);

amplitude{i}=max(abs(ER{i}));

duration{i}=length(ER{i});

%Find all extrema, both max and min

[pks_max{i},locs_max{i}] = findpeaks(ER{i});

DataInv = 1.01*max(ER{i})-ER{i};

[pks_min{i},locs_min{i}] = findpeaks(DataInv);

pks_min{i} = ER{i}(locs_min{i});

%Group max and min together and sort them by time

locs_max{i}=locs_max{i}+start_frame{i};

locs_min{i}=locs_min{i}+start_frame{i};

locs{i}=vertcat(locs_min{i},locs_max{i});locs{i}=sort(locs{i});

%Select only extrema that are located > 5 ms from each other

for k=1:length(locs{i,1})-1

if locs{i,1}(k+1)-locs{i,1}(k)<2

locs{i,1}(k)=0;

end

end

locs{i,1}(all(~locs{i,1},2),:)=[];

%Among those, select only extrema with signal > 0.5 from n-10 signal

for k=1:length(locs{i,1})

if abs(trial_alpha{i,3}(locs{i}(k))-trial_alpha{i,3}(locs{i}(k)-5))<1

locs{i,1}(k)=0;

end

end

locs{i,1}(all(~locs{i,1},2),:)=[];

%Determine signal values corresponding to selected locations

pks{i}=ER{i}(locs{i}-start_frame{i});

N_cycles{i}=length(locs{i})/2;

frequency{i}=N_cycles{i}/duration{i}*1000;

else

ER{i}=0; duration{i}=0; latency{i}=0;

end

end

%Display alpha angle for each trial

figure('units','normalized','outerposition',[0 0 1 1]); title('Kinematics_analysis')

for i=1:numTrials;

subplot(1*numTrials/10,10,i),plot(ER{i}), title(['trial ',num2str(i)])

if start_frame{i,1}~=0 && end_frame{i,1}~=0;

hold on, subplot(1*numTrials/10,10,i),plot(locs{i}-start_frame{i},ER{i}(locs{i}-start_frame{i}),'^k')

end

AX_top=round(max(Kinematics_quantitative.amplitude));

if AX_top > 0; axis([0 length(ER{i}) -AX_top AX_top]);

else axis([0 length(ER{i}) -180 180]);

end

set(gca,'FontSize',14)

if numTrials==30; set(gcf,'PaperUnits','centimeters','PaperPosition',[0,0,35,35])

else if numTrials==10; set(gcf,'PaperUnits','centimeters','PaperPosition',[0,0,35,5])

end

end

end

%Manually determine ER that were not properly detected

feedback=input('are there trials to modify?');

for i=1:length(feedback);

j=feedback(i);

figure('units','normalized','outerposition',[0 0 1 1]), plot(trial_alpha{j,3},'b', 'LineWidth',1)

hold on, line([Timeline.trial_frame_stim_start(j),Timeline.trial_frame_stim_start(j)],[-180;180],'color','r')

axis([0 durationTrials -180 180]);

[x,y]=ginput(1); start_frame{j,1}=round(x);

[x,y]=ginput(1); end_frame{j,1}=round(x);

[x,y]=ginput; pks{j}=round(y); locs{j}=round(x);

if isempty(x)==1, feedback_discard(j,1)=1;end

close;

ER{j}=trial_alpha{j,3}(start_frame{j,1}:end_frame{j,1});

latency{j}=start_frame{j}-Timeline.trial_frame_stim_start(j);

amplitude{j}=max(abs(ER{j}));

duration{j}=length(ER{j});

empty_cells = cellfun('isempty',ER);

ER(empty_cells)={0};

N_cycles{j}=length(locs{j})/2;

frequency{j}=N_cycles{j}/duration{j}*1000;

end

%Classify ER as: 0 = no movement; 1 = escape only, 2 = slow swim only, 3 = escape+slow swim

classification=cell(numTrials,1);

for i=1:numTrials;

if N_cycles{i}==(0.5||1);

classification{i}=1;

elseif isempty(N_cycles{i})==1;

classification{i}=0;

elseif N_cycles{i} > 1 && amplitude{i} < 45;

classification{i}=2;

else N_cycles{i} > 1 && amplitude{i} > 45;

classification{i}=3;

end

end

%Group alpha data per trial as: raw ; filtered ; start ; end ; max ; locs

alpha_data=cell(numTrials,6);

for i=1:numTrials;

alpha_data{i,1}=trial_alpha{i,1};

alpha_data{i,2}=trial_alpha{i,3};

alpha_data{i,3}=start_frame{i};

alpha_data{i,4}=end_frame{i};

alpha_data{i,5}=pks{i};

alpha_data{i,6}=locs{i};

end

parameters = [start_frame, end_frame, latency, amplitude, duration, N_cycles, frequency, classification];

empty_cells = cellfun('isempty',parameters); parameters(empty_cells) = {0};

%Replace values with NaN in discarded trials (ex: struggles, non-canonical escapes)

feedback_discard=input('are there trials to discard?');

for i=1:length(feedback_discard);

for j=1:length(parameters(i,:)); parameters{feedback_discard(i),j}=NaN; end

end

Kinematics_quantitative = cell2dataset (parameters, 'ReadVarNames',false, 'VarNames', {'start_frame','end_frame','latency','amplitude','duration','N_cycles','frequency','classification'});

%%

%Calculate instantaneous frequency and angular velocity for movement

for i=1:numTrials

if length(alpha_data{i,6})> 2

%instantaneous frequency and velocity for first bend

alpha_data{i,7}(1)=1000*1/(2*(alpha_data{i,6}(1)-alpha_data{i,3}));

alpha_data{i,8}(1)=abs(alpha_data{i,5}(1))+(abs(alpha_data{i,2}(alpha_data{i,3})))/(alpha_data{i,6}(1)-alpha_data{i,3});

for k=2:length(alpha_data{i,6})-1

%instantaneous frequency for following bends

alpha_data{i,7}(k)=1000*1/(2*(alpha_data{i,6}(k+1)-alpha_data{i,6}(k)));

%Adding instantaneous frequency mean and max to dataset

Kinematics_quantitative.K_instfqcy_mean(i)=mean(alpha_data{i,7});

Kinematics_quantitative.K_instfqcy_max(i)=max(alpha_data{i,7});

%instantaneous angular velocity for following bends

alpha_data{i,8}(k)=abs(alpha_data{i,5}(k+1))+(abs(alpha_data{i,5}(k)))/(alpha_data{i,6}(k+1)-alpha_data{i,6}(k));

end

end

if length(alpha_data{i,6})==2

%instantaneous frequency for first and second bend

alpha_data{i,7}(1)=1000*1/(2*(alpha_data{i,6}(1)-alpha_data{i,3}));

alpha_data{i,7}(2)=1000*1/(2*(alpha_data{i,6}(2)-alpha_data{i,6}(1)));

%instantaneous angular velocity for first bend

alpha_data{i,8}(1)=abs(alpha_data{i,5}(1))+(abs(alpha_data{i,2}(alpha_data{i,3})))/(alpha_data{i,6}(1)-alpha_data{i,3});

alpha_data{i,8}(2)=abs(alpha_data{i,5}(2))+(abs(alpha_data{i,5}(1)))/(alpha_data{i,6}(2)-alpha_data{i,6}(1));

end

if length(alpha_data{i,6})==1

alpha_data{i,7}(1)=1000*1/(2*(alpha_data{i,6}(1)-alpha_data{i,3}));

alpha_data{i,8}(1)=abs(alpha_data{i,5}(1))+(abs(alpha_data{i,2}(alpha_data{i,3})))/(alpha_data{i,6}(1)-alpha_data{i,3});

end

if isempty(alpha_data{i,6})==1

Kinematics_quantitative.K_instfqcy_mean(i)=0;

Kinematics_quantitative.K_instfqcy_max(i)=0;

Kinematics_quantitative.K_instvlcty_mean(i)=0;

Kinematics_quantitative.K_instvlcty_max(i)=0;

else

Kinematics_quantitative.K_instfqcy_mean(i)=mean(alpha_data{i,7});

Kinematics_quantitative.K_instfqcy_max(i)=max(alpha_data{i,7});

Kinematics_quantitative.K_instvlcty_mean(i)=mean(alpha_data{i,8});

Kinematics_quantitative.K_instvlcty_max(i)=max(alpha_data{i,8});

end

end

%%

%Calculate kinematics normalized parameters per fish

%Exclude discarded trials

Kinematics_quantitative_nonNaN=dataset2cell(Kinematics_quantitative);

Kinematics_quantitative_nonNaN(1,:)=[];

Kinematics_quantitative_nonNaN=cell2mat(Kinematics_quantitative_nonNaN);

Kinematics_quantitative_nonNaN(any(isnan(Kinematics_quantitative_nonNaN(:,7)),2),:)=[];

Kinematics_quantitative_nonNaN=mat2dataset(Kinematics_quantitative_nonNaN, 'VarNames', {'start_frame','end_frame','latency','amplitude','duration','N_cycles','frequency','classification','K_instfqcy_mean','K_instfqcy_max','K_instvlcty_mean','K_instvlcty_max'});

for i=1:numTrials

%Normalized amplitude

Kinematics_quantitative.K_amp_Z(i)=(Kinematics_quantitative.amplitude(i)-mean(Kinematics_quantitative_nonNaN.amplitude))/std(Kinematics_quantitative_nonNaN.amplitude);

Kinematics_quantitative.K_amp_N(i)=(Kinematics_quantitative.amplitude(i)-min(Kinematics_quantitative.amplitude))/(max(Kinematics_quantitative.amplitude)-min(Kinematics_quantitative.amplitude));

%Normalized duration

Kinematics_quantitative.K_duration_Z(i)=(Kinematics_quantitative.duration(i)-mean(Kinematics_quantitative_nonNaN.duration))/std(Kinematics_quantitative_nonNaN.duration);

Kinematics_quantitative.K_duration_N(i)=(Kinematics_quantitative.duration(i)-min(Kinematics_quantitative.duration))/(max(Kinematics_quantitative.duration)-min(Kinematics_quantitative.duration));

%Normalized instantaneous mean frequency

Kinematics_quantitative.K_instfqcy_mean_Z(i)=(Kinematics_quantitative.K_instfqcy_mean(i)-mean(Kinematics_quantitative_nonNaN.K_instfqcy_mean))/std(Kinematics_quantitative_nonNaN.K_instfqcy_mean);

Kinematics_quantitative.K_instfqcy_mean_N(i)=(Kinematics_quantitative.K_instfqcy_mean(i)-min(Kinematics_quantitative.K_instfqcy_mean))/(max(Kinematics_quantitative.K_instfqcy_mean)-min(Kinematics_quantitative.K_instfqcy_mean));

%Normalized instantaneous max frequency

Kinematics_quantitative.K_instfqcy_max_Z(i)=(Kinematics_quantitative.K_instfqcy_max(i)-mean(Kinematics_quantitative_nonNaN.K_instfqcy_max))/std(Kinematics_quantitative_nonNaN.K_instfqcy_max);

Kinematics_quantitative.K_instfqcy_max_N(i)=(Kinematics_quantitative.K_instfqcy_max(i)-min(Kinematics_quantitative.K_instfqcy_max))/(max(Kinematics_quantitative.K_instfqcy_max)-min(Kinematics_quantitative.K_instfqcy_max));

%Normalized instantaneous mean angular velocity

Kinematics_quantitative.K_instvlcty_mean_Z(i)=(Kinematics_quantitative.K_instvlcty_mean(i)-mean(Kinematics_quantitative_nonNaN.K_instvlcty_mean))/std(Kinematics_quantitative_nonNaN.K_instvlcty_mean);

Kinematics_quantitative.K_instvlcty_mean_N(i)=(Kinematics_quantitative.K_instvlcty_mean(i)-min(Kinematics_quantitative.K_instvlcty_mean))/(max(Kinematics_quantitative.K_instvlcty_mean)-min(Kinematics_quantitative.K_instvlcty_mean));

%Normalized instantaneous max angular velocity

Kinematics_quantitative.K_instvlcty_max_Z(i)=(Kinematics_quantitative.K_instvlcty_max(i)-mean(Kinematics_quantitative_nonNaN.K_instvlcty_max))/std(Kinematics_quantitative_nonNaN.K_instvlcty_max);

Kinematics_quantitative.K_instvlcty_max_N(i)=(Kinematics_quantitative.K_instvlcty_max(i)-min(Kinematics_quantitative.K_instvlcty_max))/(max(Kinematics_quantitative.K_instvlcty_max)-min(Kinematics_quantitative.K_instvlcty_max));

end

save(fullfile(strrep(DataFile,'.hdf','_Quantitative')),'Kinematics_quantitative','DataFile','TAIL','alpha_data','-append');

%%

% QUALITATIVE RESULTS

numTrials=length(Timeline);

for i=1:numTrials;

trial_alpha{i,1}=alpha_data{i,1};

trial_alpha{i,3}=alpha_data{i,2};

start_frame{i}=alpha_data{i,3};

end_frame{i}=alpha_data{i,4};

pks{i}=alpha_data{i,5};

locs{i}=alpha_data{i,6};

end

%Write combined B+K plots for qualitative results

AX1_top=round(max(Bioluminescence_quantitative.amplitude));

AX2_top=round(max(Kinematics_quantitative.amplitude));

figure(1);

for i=1:numTrials

B=signal_data{i,2};

K=alpha_data{i,2};

%Calculate frame shift due to Hiris delayed recording trigger

if Timeline.trial_stim_start(i)-Timeline.trial_frame_stim_start(i)>0;

K_shift=Timeline.trial_stim_start(i)-Timeline.trial_frame_stim_start(i);

K(K_shift:2500-1)=K(1:2500-K_shift);

else K_shift=0;

end

%Subplot bioluminescence and alpha data on combined plots

B_last=find(B,1,'last'); B(B_last:250)=B_last;

K2=K(1:10:2500);

T=1:1:250;

if numTrials==30;

figure(1),subplot_tight(1*numTrials/10,10,i);[AX,H1,H2]=plotyy(T(1:250),B(1:250),T(1:250),K2(1:250),'plot');title(['trial ',num2str(i)]);

else if numTrials==10;

figure(1),subplot_tight(1*numTrials/10*2,5,i);[AX,H1,H2]=plotyy(T(1:250),B(1:250),T(1:250),K2(1:250),'plot');title(['trial ',num2str(i)]);

end

end

line([Timeline.trial_stim_start(i)/10,Timeline.trial_stim_start(i)/10],[-2,AX1_top],'color','r')

set(H1,'color','g', 'LineWidth',1)

set(H2,'color','b','LineWidth',1)

%Set bioluminescence start/end and axis parameters

hold(AX(1),'on')

axes(AX(1))

if Bioluminescence_quantitative.signal_start(i)~=0 && isnan(Bioluminescence_quantitative.signal_start(i))==0;

plot(AX(1),Bioluminescence_quantitative.signal_start(i),signal_data{i,2}(Bioluminescence_quantitative.signal_start(i)),'og')

plot(AX(1),Bioluminescence_quantitative.signal_end(i),signal_data{i,2}(Bioluminescence_quantitative.signal_end(i)),'og')

end

set(AX(1),'XLim', [0 250])

set(AX(1),'XTick',0:50:250)

if AX1_top > 0; set(AX(1),'YLim', [-2 AX1_top]); set(AX(1),'YTick',-2:4:AX1_top);

else set(AX(1),'YLim', [-2 10]); set(AX(2),'YTick',-2:4:10)

end

set(AX(1),'YColor','g')

%Set alpha angle start/end/max and axis parameters

hold(AX(2),'on')

axes(AX(2))

if start_frame{i,1}~=0 %%&& end_frame{i,1}~=0;

plot(AX(2),(start_frame{i,1}+K_shift)/10,alpha_data{i,2}(start_frame{i,1}),'ob')

plot(AX(2),(end_frame{i,1}+K_shift)/10,alpha_data{i,2}(end_frame{i,1}),'ob')

plot(AX(2),(locs{i}+K_shift)/10,alpha_data{i,2}(locs{i}),'^k')

end

set(AX(2),'XLim', [0 250])

if AX2_top > 0; set(AX(2),'YLim', [-AX2_top AX2_top]); set(AX(2),'YTick',-AX2_top:40:AX2_top)

else set(AX(2),'YLim', [-180 180]); set(AX(2),'YTick',-180:40:180)

end

set(AX(2),'YColor','b')

hold(AX(2),'off')

end

%Save results as matlab figure

delete(fullfile(strrep(DataFile,'.hdf','_Qualitative.fig')));

imageFileName=fullfile(strrep(DataFile,'.hdf','_Qualitative.fig'));

saveas(figure(1),imageFileName,'fig');

%%

end

clear all
